# Supplementary material for: AraBAD Based Toolkit for Gene Expression and Metabolic Robustness Improvement in Synechococcus elongatus
Source: PubMed Central journal article supplement (PMC5741739; doi:10.1038/s41598-017-17035-4), 2017-12-22
Supplement: 41598_2017_17035_MOESM1_ESM.pdf [file 41598_2017_17035_MOESM1_ESM.pdf]

1 **Supplementary Information**

2

3 **AraBAD Based Toolkit for Gene Expression and Metabolic Robustness**  
4 **Improvement in *Synechococcus elongatus***

5

6 **Yi-Qi Cao<sup>1</sup>, Qian Li<sup>1</sup>, Peng-Fei Xia<sup>1</sup>, Liu-Jing Wei<sup>2</sup>, Ning Guo<sup>1</sup>, Jian-Wei Li<sup>1</sup>,**  
7 **Shu-Guang Wang<sup>1,\*</sup>**

8

9 <sup>1</sup>School of Environmental Science and Engineering, Shandong University, 27 Shanda  
10 Nanlu, Jinan 250100, China

11 <sup>2</sup>State Key Laboratory of Bioreactor Engineering, East China University of Science and  
12 Technology, 130 Meilong Road, Shanghai 200237, China

13 \*Correspondence and materials should be addressed to S.-G.W. (email: wsg@sdu.edu.cn)

14

15 **Figure legends**

16 **Figure S1.** Fluorescence of eGFP and mtGFP led by P<sub>BAD</sub> promoter in *S. elongatus* after  
17 inducing with 2 g/L *L*-arabinose for 2 days.

18 **Figure S2.** Standardized fluorescent intensity (RFU/OD<sub>600</sub>) of *E. coli* BW25113, YQe1  
19 (P<sub>BAD</sub>) and YQe2 (P<sub>Ttc</sub>) under non-induced condition. An asterisk (\*) represents a  
20 statistical difference ( $p < 0.05$ ).

21 **Figure S3.** Fluorescence images of *S. elongatus* strains. (A) YQs1 and (B) YQs2 after  
22 inducing with 20 g/L *L*-arabinose and 5 mM IPTG for 2 days, respectively.

23 **Figure S4.** Growth curve of *S. elongatus* in continuous light condition with or without 2  
24 g/L *L*-arabinose for 10 days.

25

26 **Table legends**

27 **Table S1.** Plasmids used in this study

28 **Table S2.** Primers used in this study

29

30 **Figures**

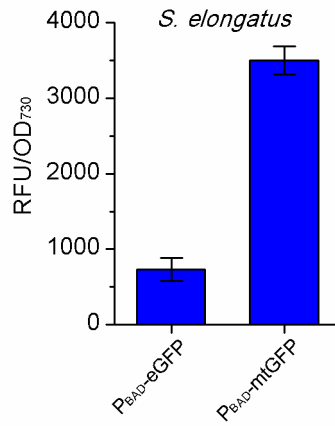

31

32 **Figure S1.** Fluorescence of eGFP and mtGFP led by P<sub>BAD</sub> promoter in *S. elongatus* after

33 inducing with 2 g/L *L*-arabinose for 2 days.

34

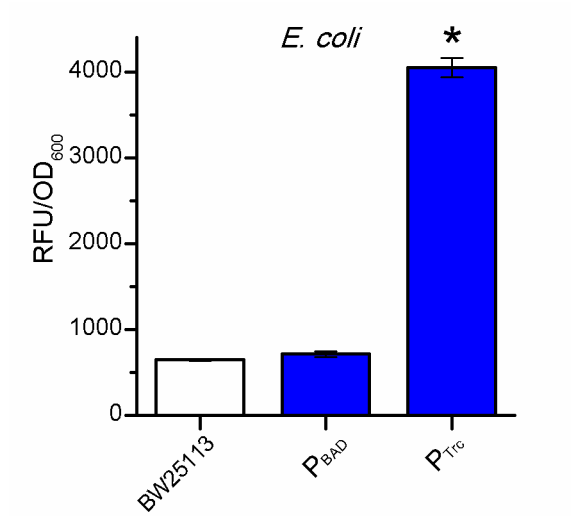

35

36 **Figure S2.** Standardized fluorescent intensity (RFU/OD<sub>600</sub>) of *E. coli* BW25113, YQe1  
37 (P<sub>BAD</sub>) and YQe2 (P<sub>Tre</sub>) under non-induced condition. An asterisk (\*) represents a  
38 statistical difference ( $p < 0.05$ ).

39

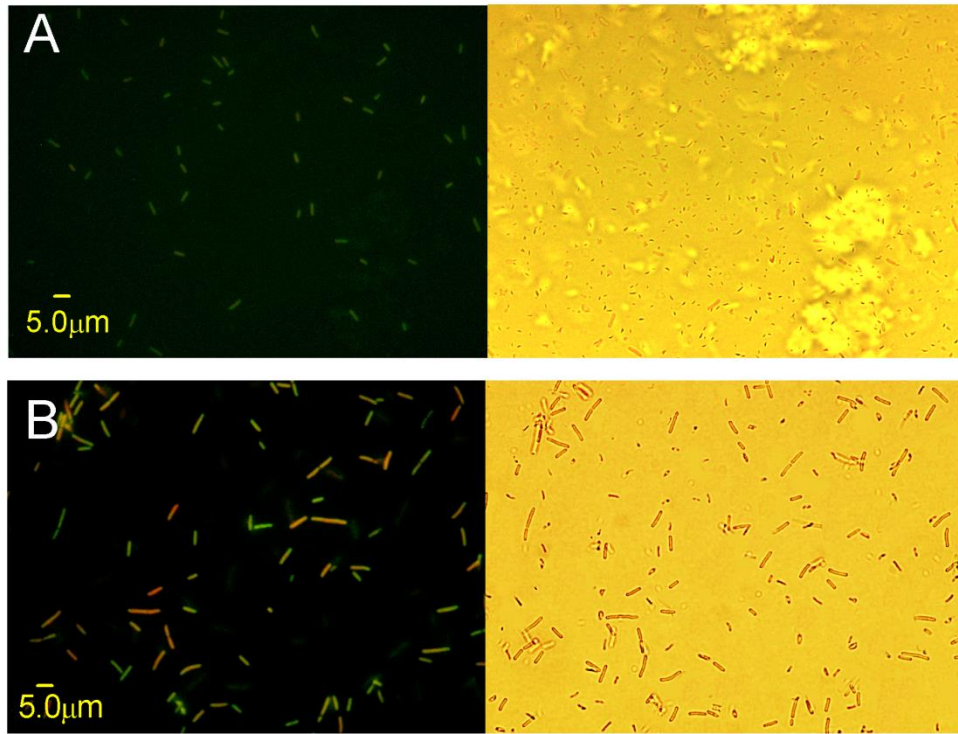

40

41 **Figure S3.** Fluorescence images of *S. elongatus* strains. (A) YQs1 and (B) YQs2 after  
42 inducing with 20 g/L *L*-arabinose and 5 mM IPTG for 2 days, respectively.

43

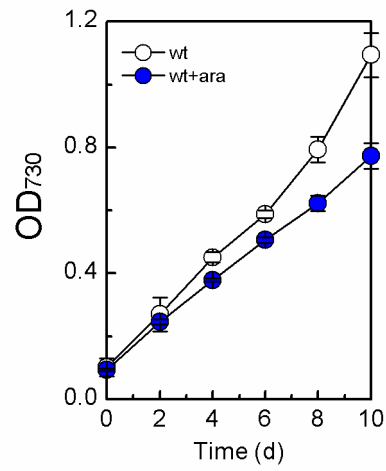

44

45 **Figure S4.** Growth curve of *S. elongatus* in continuous light condition with or without 2

46 g/L *L*-arabinose for 10 days.

47

48 **Tables**49 **Table S1.** Plasmids used in this study.

| <b>Plasmids</b> | <b>Genotypes</b>                                                | <b>Sources</b> |
|-----------------|-----------------------------------------------------------------|----------------|
| pAM2991         | NSI targeting vector; $P_{\text{Trc}}$ ; $\text{Sp}^{\text{R}}$ | Addgene #40248 |
| pAM1573         | NSII targeting vector; $\text{Cm}^{\text{R}}$                   | Addgene #40239 |
| pcrRNA.ind      | <i>araC</i> - $P_{\text{BAD}}$ ; $\text{Amp}^{\text{R}}$        | Addgene #61284 |
| pcrRNA.con      | $P_{\text{J23119}}$ ; $\text{Amp}^{\text{R}}$                   | Addgene #61285 |
| pYQ1            | pAM2991, but $P_{\text{Trc}}$ : <i>araE</i>                     | This study     |
| pYQ2            | pAM2991, but $P_{\text{Trc}}$ : <i>mtgfp</i>                    | This study     |
| pYQ3            | pAM2991, but $P_{\text{Trc}}$ : <i>araE</i> - <i>mtgfp</i>      | This study     |
| pYQ4            | pcrRNA.ind, but $P_{\text{BAD}}$ : <i>mtgfp</i>                 | This study     |
| pYQ5            | pAM2991, but $P_{\text{BAD}}$ : <i>mtgfp</i>                    | This study     |
| pYQ6            | pYQ1 containing $P_{\text{BAD}}$ - <i>mtgfp</i>                 | This study     |
| pYQ7            | pcrRNA.con, but $P_{\text{J23119}}$ : <i>araA-araB-araD</i>     | This study     |
| pYQ8            | pAM1573, but $P_{\text{J23119}}$ : <i>araA-araB-araD</i>        | This study     |

50

51

52 **Table S2.** Primers used in this study.

| Primers | Sequences (5'-3')                                                                         |
|---------|-------------------------------------------------------------------------------------------|
| Q1      | ccggaattcatggttactatcaatac ggaatctg                                                       |
| Q2      | ccggaattctcagacgccgatatttctcaa                                                            |
| Q3      | ccggaattcatggttactatcaatac ggaatctgct                                                     |
| Q4      | gtgaatagttcctcgccttttgacatgac gcc gatatttctcaactt                                         |
| Q5      | aagttgagaaatcgcgc gtc atgtcaaaa ggc ga ggaactatt                                          |
| Q6      | ccggaattcttacttgataa ttc atccatgccca                                                      |
| Q7      | ccggaattcatgtcaaaa ggc ga ggaactatt                                                       |
| Q8      | cccaagcttttacttgataa ttc atccatgccca                                                      |
| Q9      | aaggaaaaaagcggccgcttatgacaactgac ggc tacatca                                              |
| Q10     | aaggaaaaaagcggccgcaaaa ggc catcc gtca ggat                                                |
| Q14     | catggcgcgaaggc atattac gggca gtaaacgca gaa gc ggtc tgataaacagaatt                         |
| Q15     | ccacacttcataattatcaaaaatcgtcat gtaccgagctcgaattc gctagc gctagca                           |
| Q16     | tgctagc gctagc gaattc gagc tc ggtac atgac gat tttt gataa tta tgaagt gggttt gtcatt ggca gc |
| Q17     | gccaaaatc gaggccaattgcaatc gccat tta gc gac gaaaccc gtaatac acttc gttccagc gca g          |
| Q40     | ccgctc gaggctcat gttt gac agc tta tcatc gat                                               |
| Q41     | tgctctagaaaaaggccatcc gtca ggat                                                           |
| Q50     | ccggaattcatgtcaaaa ggc ga ggaactatt                                                       |
| Q51     | cgcggatccttacttgataa ttc atccatgccca                                                      |
